# Supplementary material for: Structural insights into functional properties of the oxidized form of cytochrome c oxidase
Source: PubMed Central journal article supplement (PMC10505203; doi:10.1038/s41467-023-41533-x), 2023-09-16
Supplement: 41467_2023_41533_MOESM1_ESM.pdf [file 41467_2023_41533_MOESM1_ESM.pdf]

## Supplementary Information

# Structural insights into functional properties of the oxidized form of cytochrome *c* oxidase

Izumi Ishigami<sup>1</sup>, Raymond G. Sierra<sup>2</sup>, Zhen Su<sup>2,3</sup>, Ariana Peck<sup>2</sup>, Cong Wang<sup>2</sup>, Frederic Poitevin<sup>2</sup>, Stella Lisova<sup>2</sup>, Brandon Hayes<sup>2</sup>, Frank R. Moss III<sup>2,†</sup>, Sébastien Boutet<sup>2</sup>, Robert E. Sublett<sup>2</sup>, Chun Hong Yoon<sup>2</sup>, Syun-Ru Yeh<sup>1,\*</sup>, and Denis L. Rousseau<sup>1,\*</sup>

1. Department of Biochemistry, Albert Einstein College of Medicine, Bronx, NY 10461 USA
2. Linac Coherent Light Source, SLAC National Accelerator Laboratory, Menlo Park, CA 94025 USA
3. Department of Applied Physics, Stanford University, Stanford, CA 94305 USA

The PDF file includes:

Supplementary Figures 1 to 3  
Supplementary Table 1  
Supplementary References

---

<sup>†</sup>Current address: Frank R. Moss III, Altos Labs, Redwood City, CA 94065

\*Address correspondence to: syun-ru.yeh@einsteinmed.edu or denis.rousseau@einsteinmed.edu

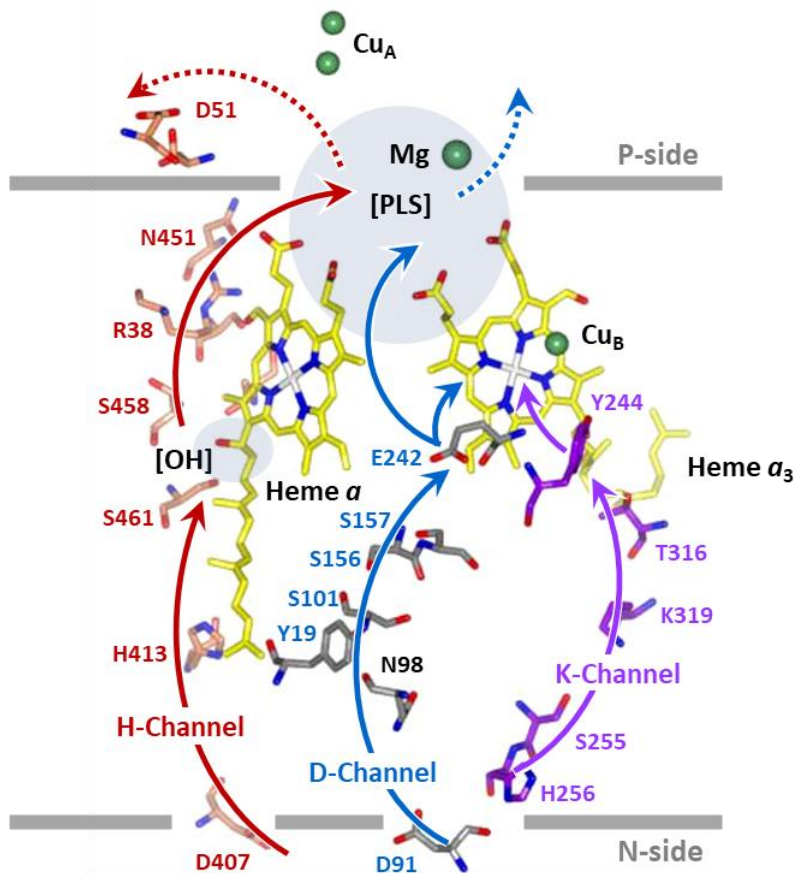

**Supplementary Fig. 1. Proton transfer channels in bCcO.** Based on structural and mutagenesis studies of bacterial enzymes, two proton transfer channels, the D and K-channels, have been proposed in CcO<sup>1</sup>. The D-channel, starting at D91 (bCcO numbering) and ending at E242 (which serves as a diverter valve), delivers either substrate protons to the BNC during the oxidative phase of the catalytic cycle, or pumped protons to the PLS for subsequent translocation to the P-side of the membrane. The K-channel, starting at H256 and ending at Y244, delivers substrate protons to the BNC during the reductive phase of the catalytic cycle. An additional channel, the H-channel, starting at D407 and ending at D51, was proposed in bCcO, which translocates pumped protons to the P-side of the membrane *via* the PLS, as gated by either a water pool<sup>2</sup> or the hydroxide group of the farnesyl sidechain (indicated as [OH])<sup>3</sup> of heme *a*. The role of the H-channel, however, remains controversial as it is not conserved in bacterial CcOs<sup>4,5</sup>.

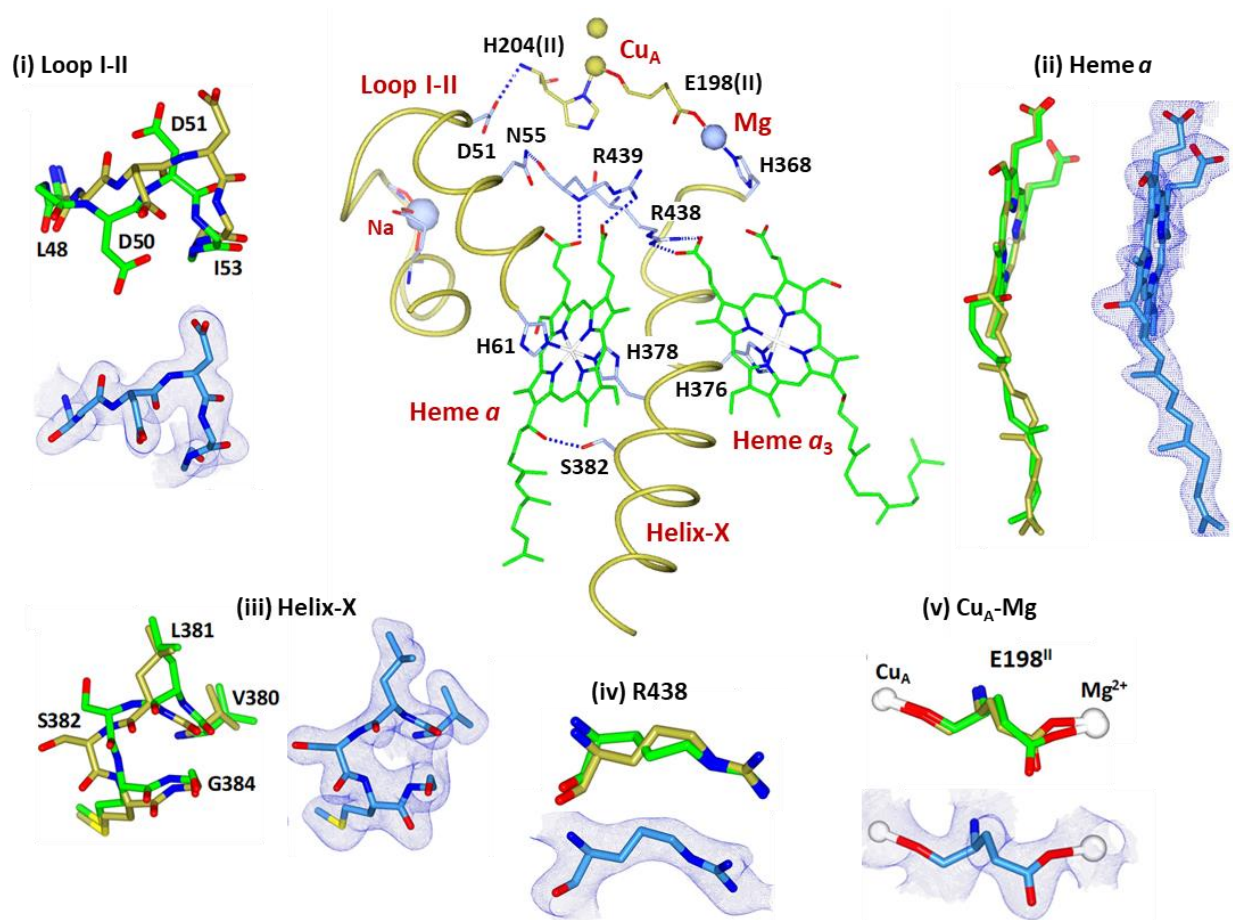

**Supplementary Fig. 2. SFX structure of the O derivative of bCcO in the redox sensitive regions.** Inset (i)-(v) show the structural comparison of the oxidized enzyme determined with synchrotron radiation (**O\***) (in yellow) and reduced enzyme (**R**) (in green) in the redox sensitive regions. The  $2F_o - F_c$  electron density map of **O**, contoured at  $1.5 \sigma$ , is shown in each inset to demonstrate that the structure of **O**, consistent with that of **O\***, is in the oxidized state. The PDB IDs of the **O\*** and **R** are 7TIE and 7THU, respectively.

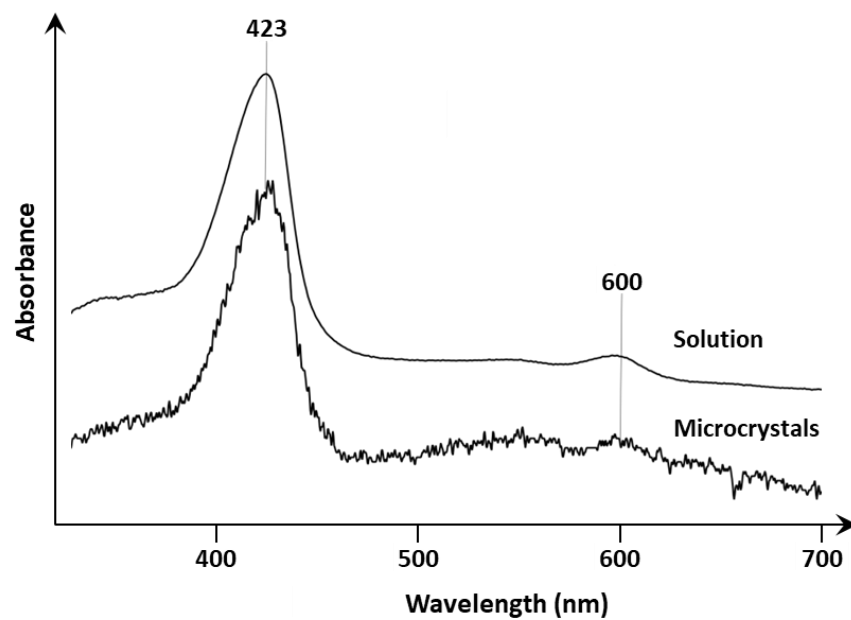

**Supplementary Fig. 3. UV-Vis absorption spectra of oxidized bCcO in the free solution phase and in the microcrystalline state.** The Soret maximum at 423 nm indicates that the bCcO samples are in the same fast (active) form.<sup>6</sup>

**Supplementary Table 1.** Crystallographic data collection and refinement statistics (molecular replacement).

|                                                     | 8GCQ                                           |
|-----------------------------------------------------|------------------------------------------------|
| <b>Data collection</b>                              |                                                |
| Wavelength(Å)                                       | 1.24                                           |
| Temperature (K)                                     | 293                                            |
| beamline                                            | SLAC LCLS MFX                                  |
| Space group                                         | P 2 <sub>1</sub> 2 <sub>1</sub> 2 <sub>1</sub> |
| Cell dimensions                                     |                                                |
| <i>a</i> , <i>b</i> , <i>c</i> (Å)                  | 178.60, 189.50, 211.10                         |
| α, β, γ (°)                                         | 90.00, 90.00, 90.00                            |
| Resolution (Å)                                      | 33.00-2.38(32.80-2.38) *                       |
| <i>R</i> <sub>sprit</sub>                           | 0.2296(0.6388)                                 |
| <i>I</i> / σ <i>I</i>                               | 4.59(1.78)                                     |
| Completeness (%)                                    | 100(100)                                       |
| Redundancy                                          | 2742(2286)                                     |
| <b>Refinement</b>                                   |                                                |
| Resolution (Å)                                      | 35.00-2.38                                     |
| No. reflections                                     | 270,854                                        |
| <i>R</i> <sub>work</sub> / <i>R</i> <sub>free</sub> | 0.232 / 0.266                                  |
| No. atoms                                           | 31,465                                         |
| Protein                                             | 28,514                                         |
| Ligand/ion                                          | 2,350                                          |
| Water                                               | 601                                            |
| <i>B</i> -factors                                   | 34.79                                          |
| Protein                                             | 32.42                                          |
| Ligand/ion                                          | 64.39                                          |
| Water                                               | 31.74                                          |
| R.m.s. deviations                                   |                                                |
| Bond lengths (Å)                                    | 0.0114                                         |
| Bond angles (°)                                     | 1.742                                          |
| Ramachandran statistics (%)                         |                                                |
| Favored                                             | 89.24                                          |
| Allowed                                             | 9.73                                           |
| Outliers                                            | 1.03                                           |

\*Values in parentheses are for highest-resolution shell.

## Supplementary References

- 1 Wikstrom, M., Krab, K. & Sharma, V. Oxygen Activation and Energy Conservation by Cytochrome c Oxidase. *Chemical reviews* **118**, 2469-2490, doi:10.1021/acs.chemrev.7b00664 (2018).
- 2 Shimokata, K. *et al.* The proton pumping pathway of bovine heart cytochrome c oxidase. *Proceedings of the National Academy of Sciences of the United States of America* **104**, 4200-4205, doi:10.1073/pnas.0611627104 (2007).
- 3 Ishigami, I. *et al.* Snapshot of an Oxygen Intermediate in the Catalytic Reaction of Cytochrome c Oxidase. *Proc Nat Acad Sci (USA)* **116**, 3572-3577 (2019).
- 4 Qin, L. *et al.* Redox-dependent conformational changes in cytochrome C oxidase suggest a gating mechanism for proton uptake. *Biochemistry* **48**, 5121-5130, doi:10.1021/bi9001387 (2009).
- 5 Yoshikawa, S. & Shimada, A. Reaction mechanism of cytochrome C oxidase. *Chemical reviews* **115**, 1936-1989, doi:10.1021/cr500266a (2015).
- 6 Baker, G. M., Noguchi, M. & Palmer, G. The reaction of cytochrome oxidase with cyanide. Preparation of the rapidly reacting form and its conversion to the slowly reacting form. *The Journal of biological chemistry* **262**, 595-604 (1987).
